# Supplementary material for: What caused large ozone variabilities in three megacity clusters in eastern China during 2015–2020?
Source: Copernicus journal article supplement (doi:10.5194/acp-24-1607-2024), 2024-02-05
Supplement: Supplementary file 1 [file acp-24-1607-2024-supplement.pdf]

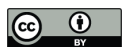

*Supplement of*

## **What caused large ozone variabilities in three megacity clusters in eastern China during 2015–2020?**

**Tingting Hu et al.**

*Correspondence to:* Run Liu (liurun@jnu.edu.cn) and Shaw Chen Liu (shawliu@jnu.edu.cn)

The copyright of individual parts of the supplement might differ from the article licence.

## Supplementary Figures

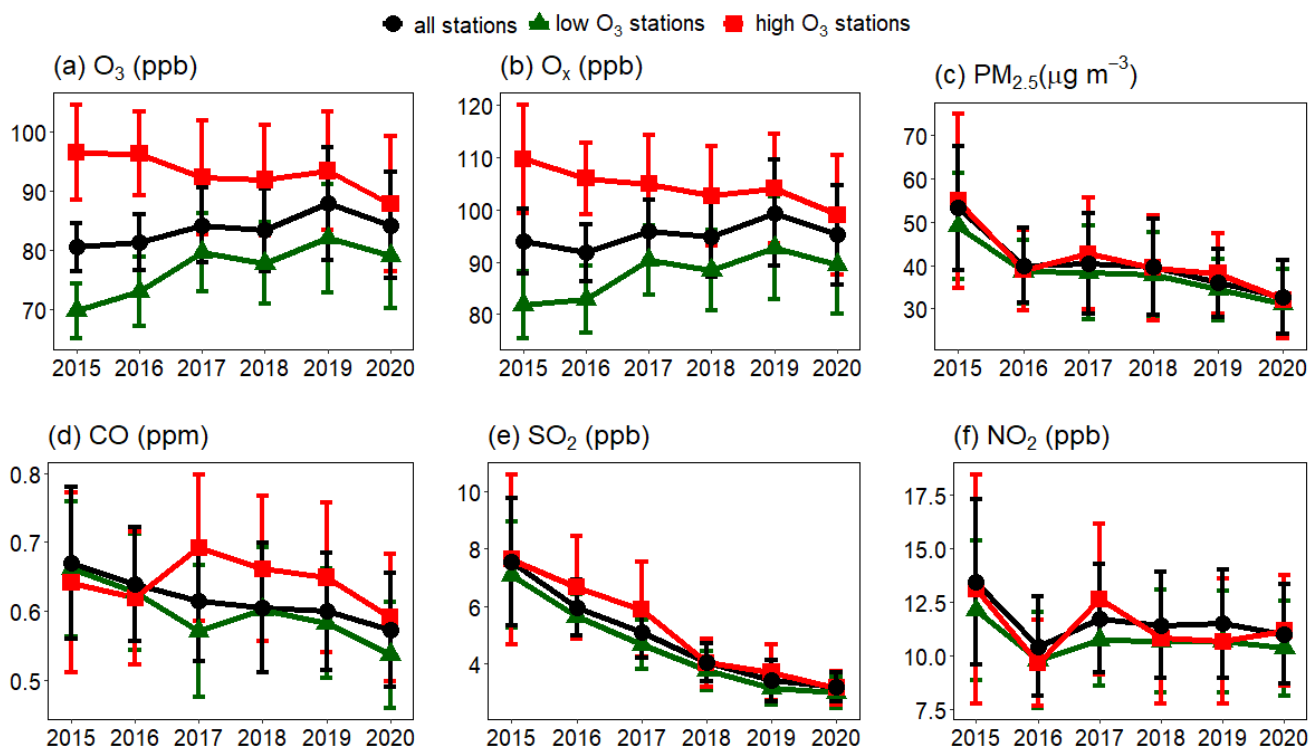

**Figure S1.** Annual mean concentrations of maximum daily 8-hour average O<sub>3</sub> in YRD during O<sub>3</sub>-exceeding days for all stations (black), high O<sub>3</sub> stations (red) and low O<sub>3</sub> stations (green) (a), same as (a) except for O<sub>x</sub> (b), PM<sub>2.5</sub> (c), CO (d), SO<sub>2</sub> (e), NO<sub>2</sub> (f). The criterion of low O<sub>3</sub> stations is 37days, and the number of low O<sub>3</sub> stations is 54.

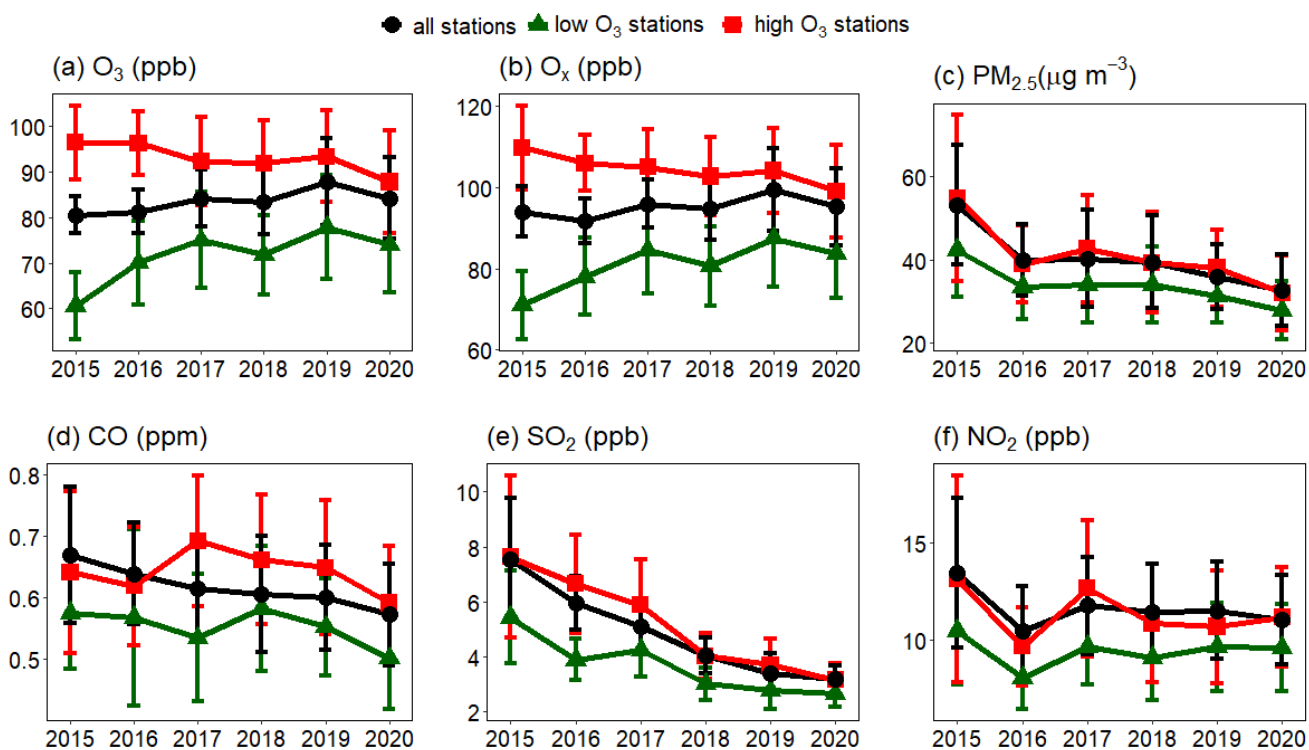

**Figure S2.** Annual mean concentrations of maximum daily 8-hour average O<sub>3</sub> in YRD during O<sub>3</sub>-exceeding days for all stations (black), high O<sub>3</sub> stations (red) and low O<sub>3</sub> stations (green) (a), same as (a) except for O<sub>x</sub> (b), PM<sub>2.5</sub> (c), CO (d), SO<sub>2</sub> (e), NO<sub>2</sub> (f). The criterion of low O<sub>3</sub> stations is 19 days, and the number of low O<sub>3</sub> stations is 15.

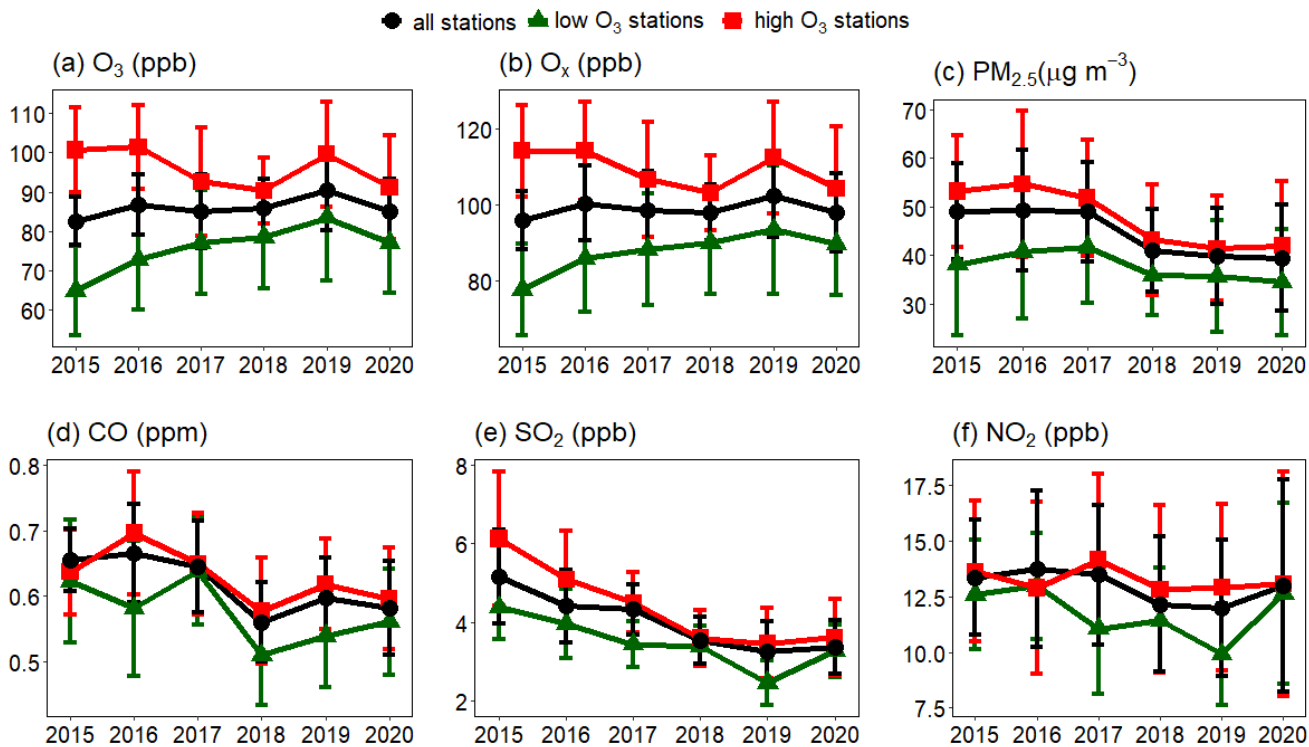

**Figure S3.** Annual mean concentrations of maximum daily 8-hour average O<sub>3</sub> in PRD during O<sub>3</sub>-exceeding days for all stations (black), high O<sub>3</sub> stations (red) and low O<sub>3</sub> stations (green) (a), same as (a) except for O<sub>x</sub> (b), PM<sub>2.5</sub> (c), CO (d), SO<sub>2</sub> (e), NO<sub>2</sub> (f).

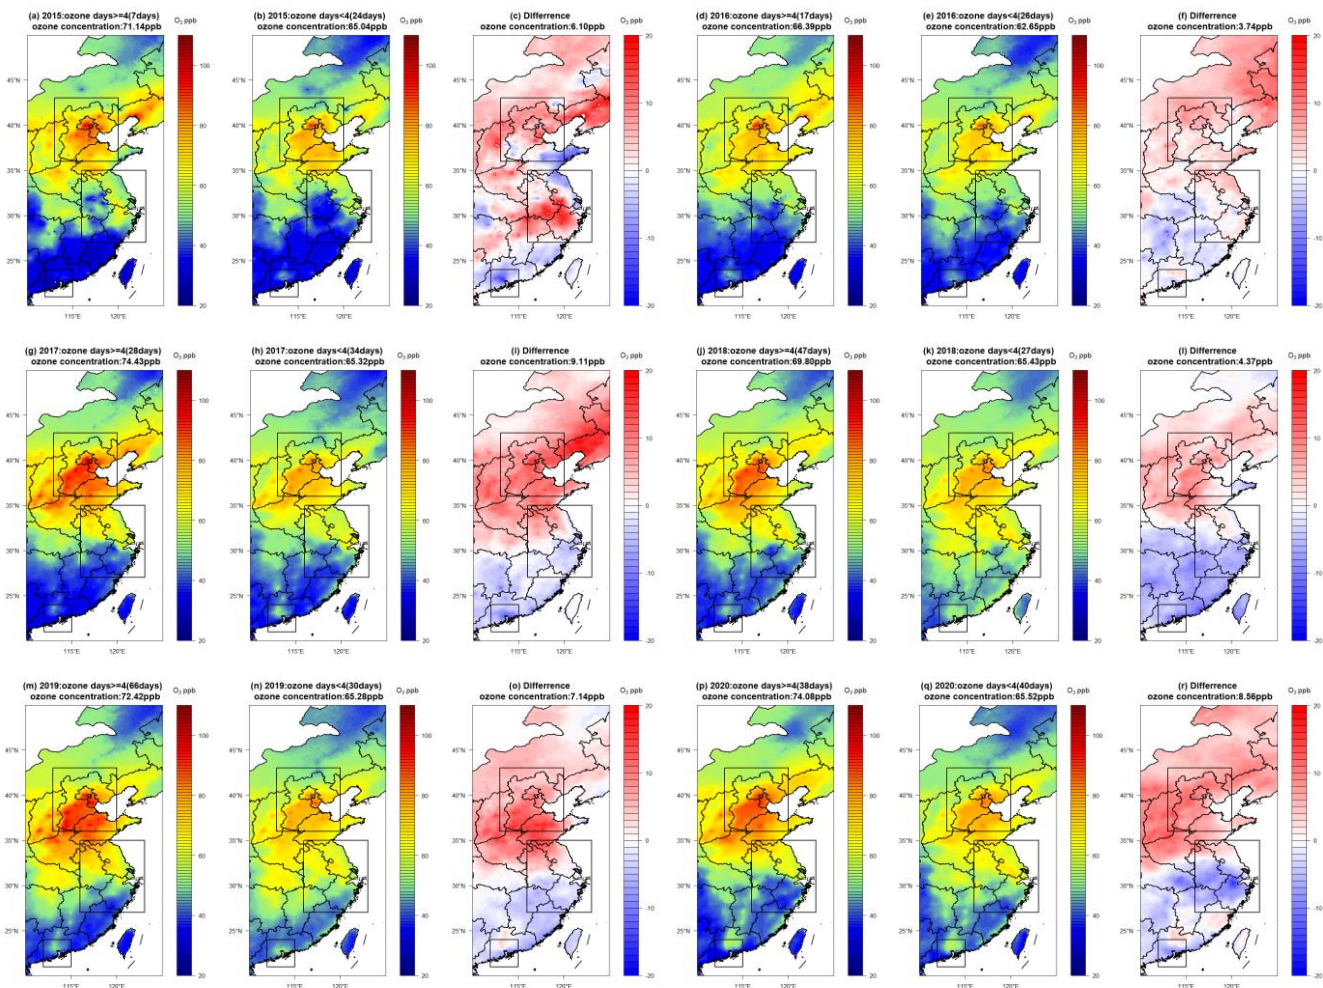

25

**Figure S4.** Spatial distribution of daily mean MDA8 O<sub>3</sub> (in ppb per day) of O<sub>3</sub>-exceeding days in BTH for O<sub>3</sub> episodes with four or more consecutive O<sub>3</sub>-exceeding days, O<sub>3</sub> episodes with less than four consecutive O<sub>3</sub>-exceeding days and their difference in 2015–2020.

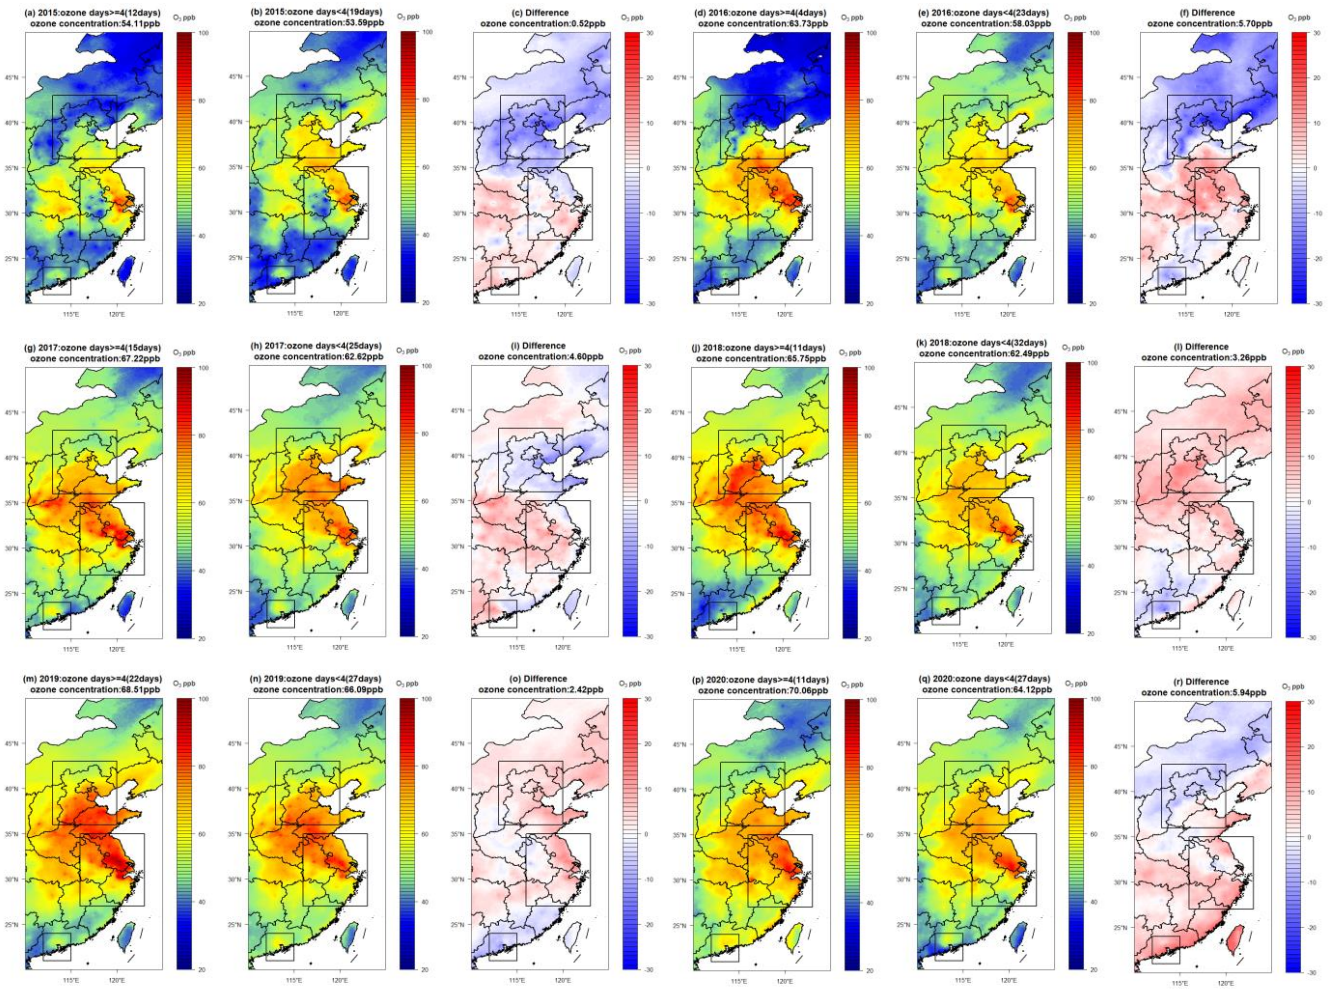

30 **Figure S5.** Spatial distribution of daily mean MDA8 O<sub>3</sub> (in ppb per day) of O<sub>3</sub>-exceeding days in YRD for O<sub>3</sub> episodes with four or more consecutive O<sub>3</sub>-exceeding days, O<sub>3</sub> episodes with less than four consecutive O<sub>3</sub>-exceeding days and their difference in 2015–2020.

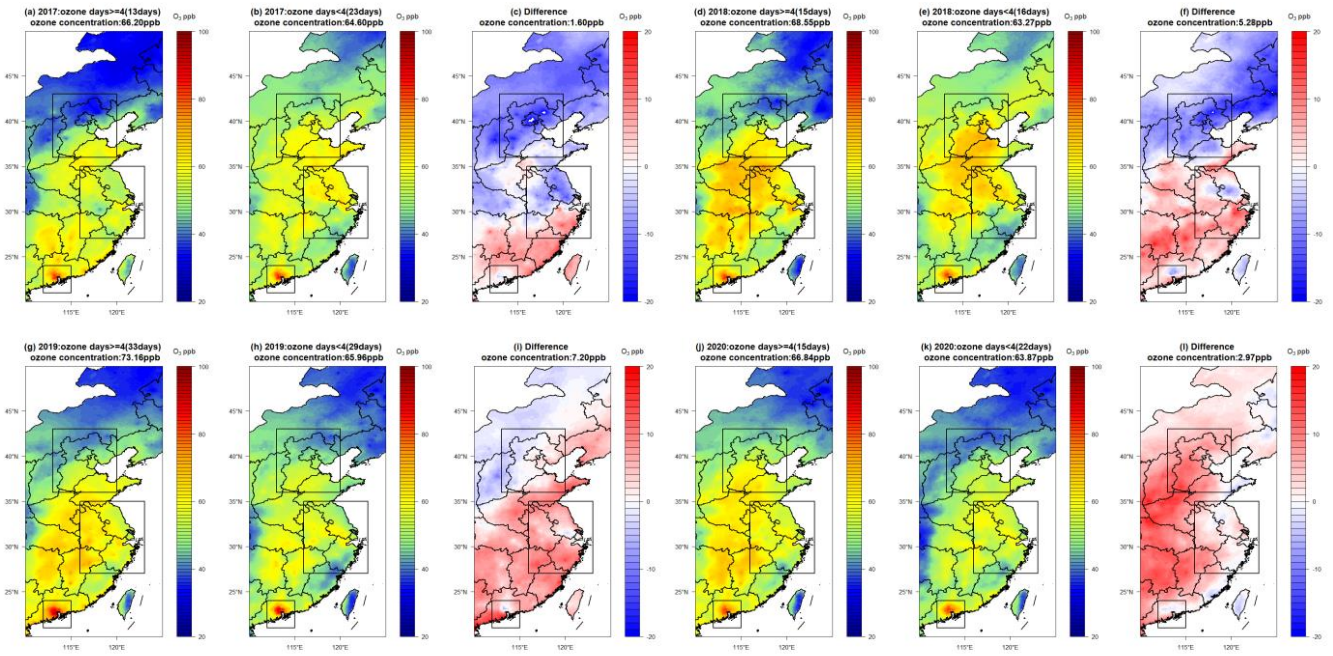

**Figure S6.** Spatial distribution of daily mean MDA8  $O_3$  (in ppb per day) of  $O_3$ -exceeding days in PRD for  $O_3$  episodes with four or more consecutive  $O_3$ -exceeding days,  $O_3$  episodes with less than four consecutive  $O_3$ -exceeding days and their difference in 2017–2020.

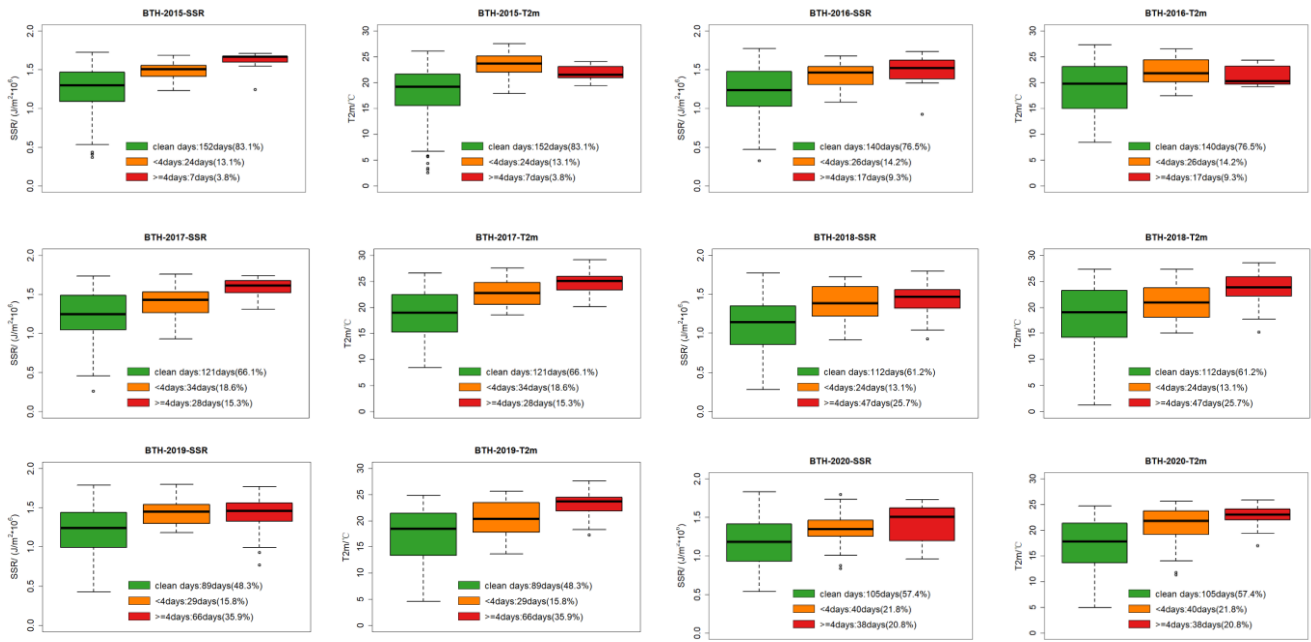

**Figure S7.** Solar radiation (SSR) and temperature (T2m) at the surface in BTH in April–September 2015–2020 for O<sub>3</sub> episodes with four or more consecutive O<sub>3</sub>-exceeding days, clean days (non-O<sub>3</sub>-exceeding days) and O<sub>3</sub> episodes with less than four consecutive O<sub>3</sub>-exceeding days.

40



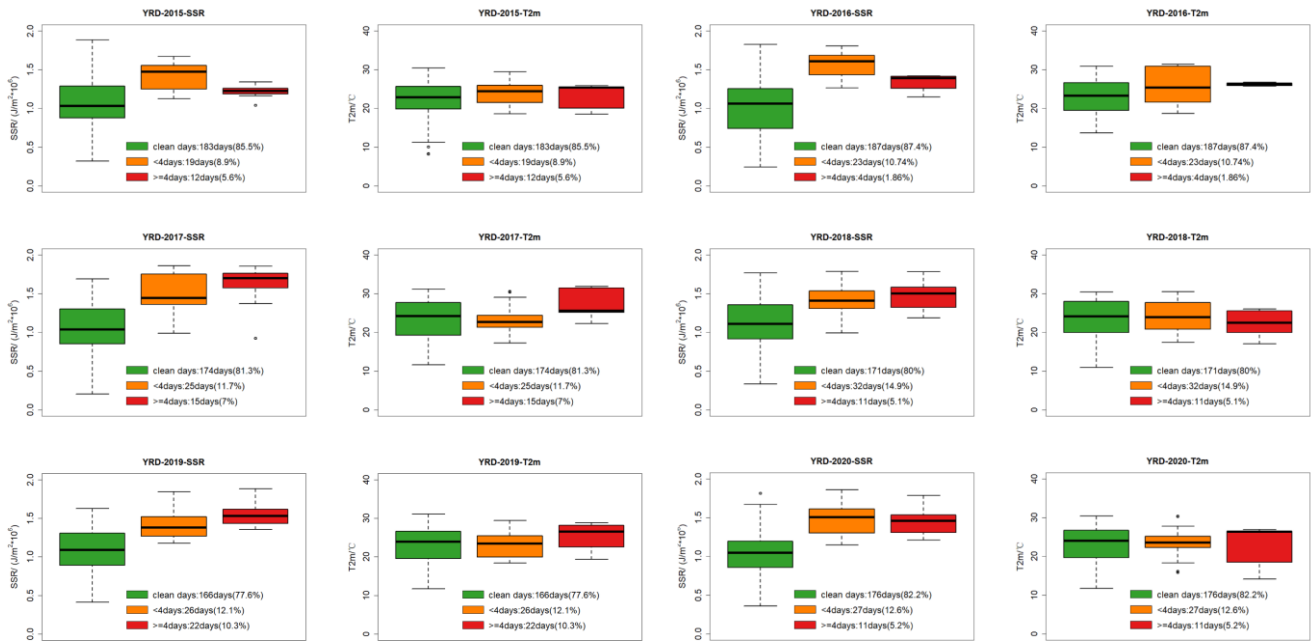

**Figure S8.** Solar radiation (SSR) and temperature (T2m) at the surface in YRD in April–October 2015–2020 for O<sub>3</sub> episodes with four or more consecutive O<sub>3</sub>-exceeding days, clean days (non-O<sub>3</sub>-exceeding days) and O<sub>3</sub> episodes with less than four consecutive O<sub>3</sub>-exceeding days.

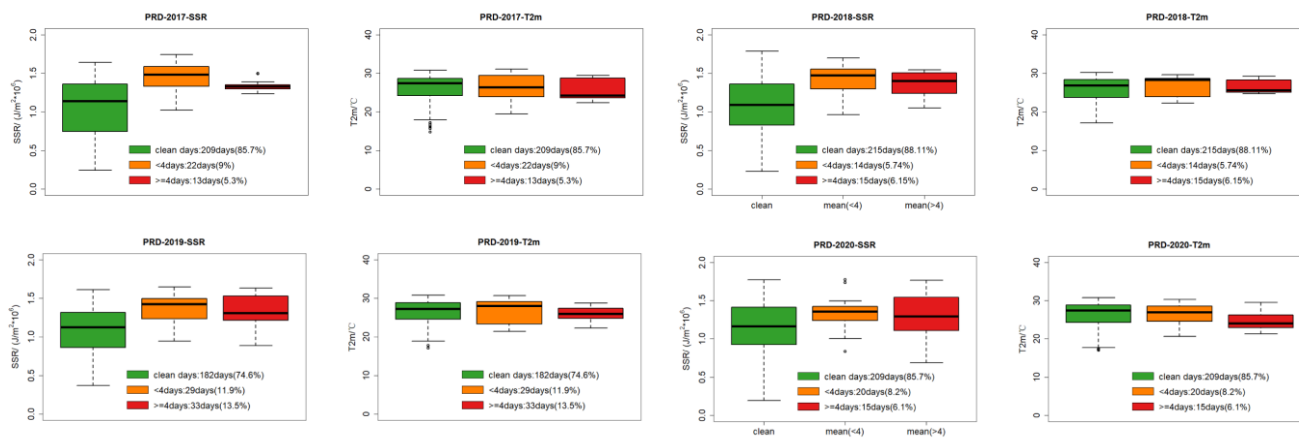

**Figure S9.** Solar radiation (SSR) and temperature (T2m) at the surface in PRD in April–November 2017–2020 for O<sub>3</sub> episodes with four or more consecutive O<sub>3</sub>-exceeding days, clean days (non-O<sub>3</sub>-exceeding days) and O<sub>3</sub> episodes with less than four consecutive O<sub>3</sub>-exceeding days.

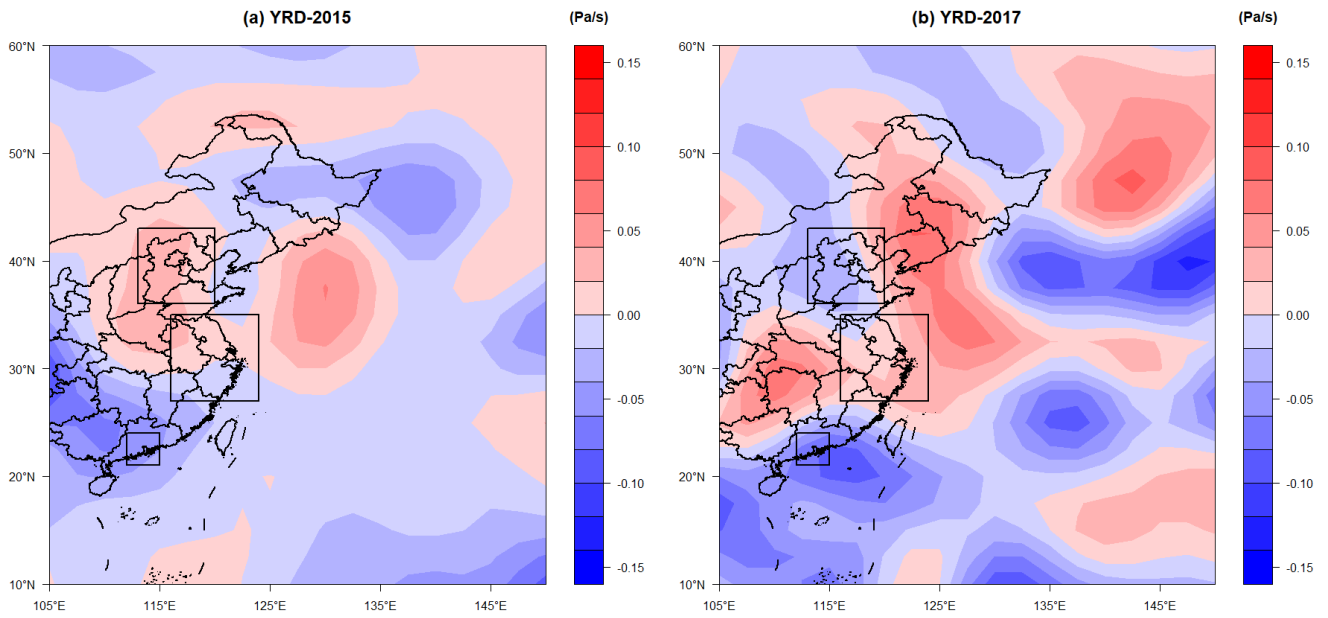

50 **Figure S10.** Mean vertical velocity at 850hPa during  $O_3$ -exceeding days in YRD in 2015 (a) and during episodes with four or more consecutive  $O_3$ -exceeding days in 2017 (b).

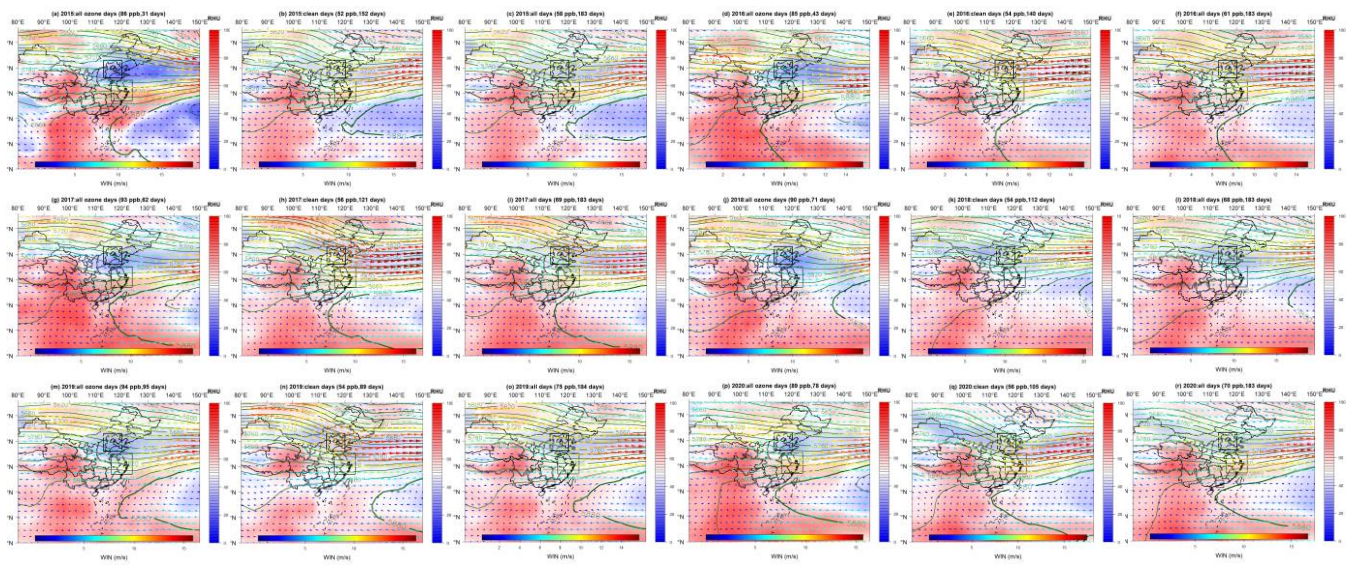

**Figure S11.** Composite 500 hPa geopotential height contours, humidity and winds in BTH in April–September for O<sub>3</sub>-exceeding days, clean days and all days in 2015–2020.

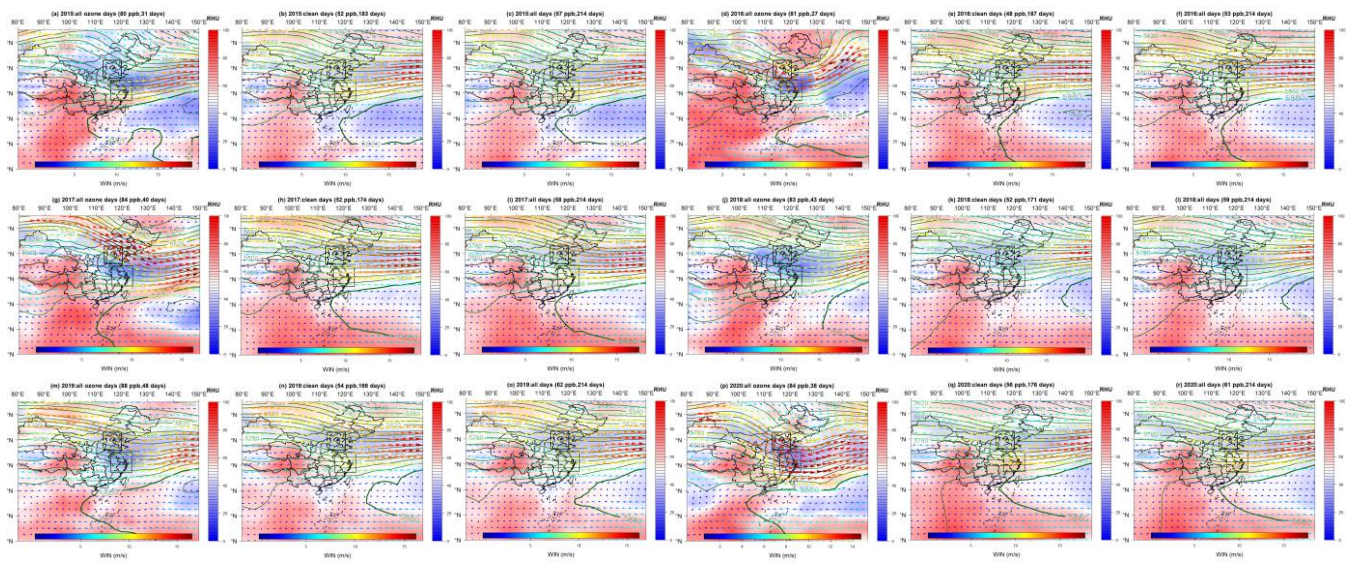

55

**Figure S12.** Composite 500 hPa geopotential height contours, humidity and winds in YRD in April–October for O<sub>3</sub>-exceeding days, clean days and all days in 2015–2020.

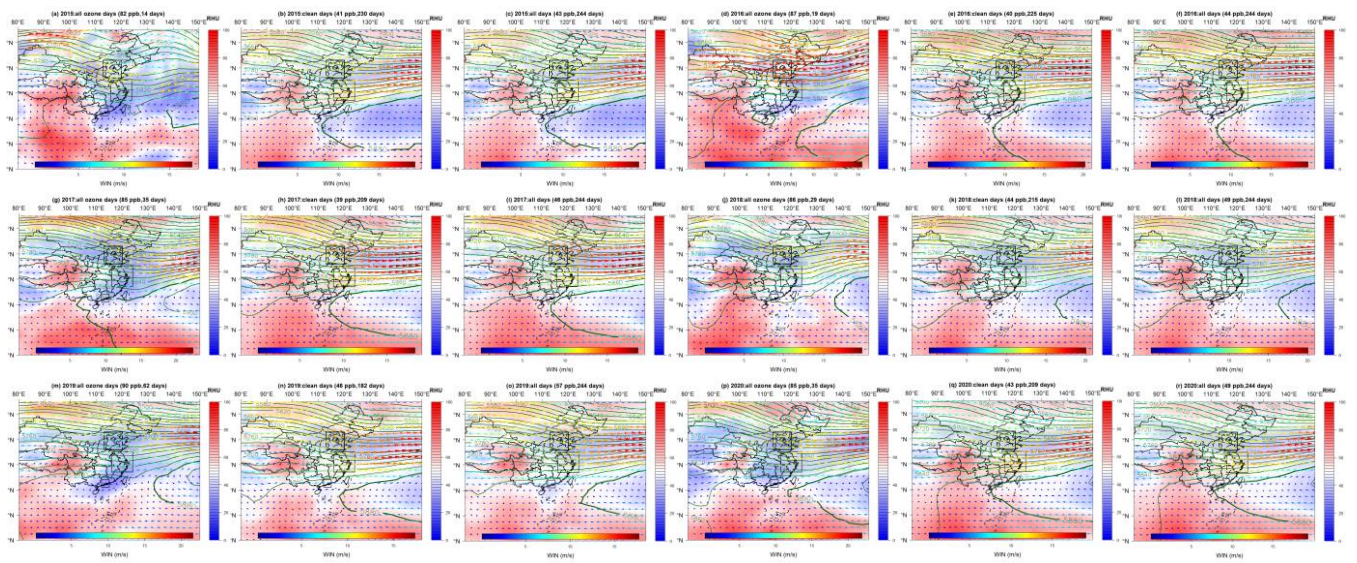

**Figure S13.** Composite 500 hPa geopotential height contours, humidity and winds in PRD in April–November for O<sub>3</sub>-60 exceeding days, clean days and all days in 2015–2020.

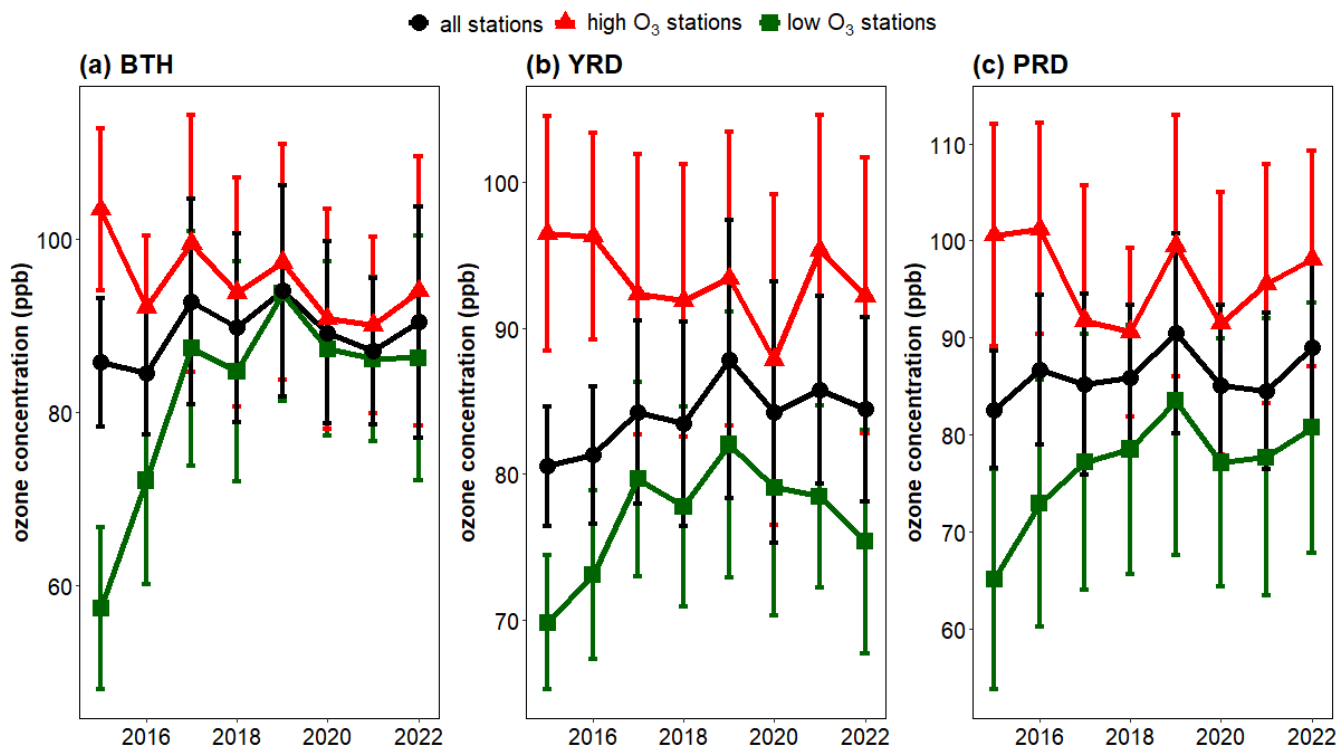

**Figure S14.** Annual mean concentrations of maximum daily 8-hour average O<sub>3</sub> during O<sub>3</sub>-exceeding days for all stations (black), high O<sub>3</sub> stations (red) and low O<sub>3</sub> stations (green) in BTH in 2015–2022 (a), YRD (b) and PRD (c).
